# Supplementary material for: Role of PRPS2 as a prognostic and therapeutic target in osteosarcoma
Source: HighWire-hosted journal article supplement (doi:10.1136/jclinpath-2020-206505), 2021-02-15
Supplement: jclinpath-2020-206505supp002_data_supplement.xlsx [file jclinpath-2020-206505supp002_data_supplement.xlsx]

## Sheet: Sheet1
Number	PRPS2	PRPS2	KI-67	KI-67	P-M-TOR	P-M-TOR
1	0	弱+	0	8	0	-
2	0	-	0	5	0	-
3	0	-	0	2	1	12%+
4	0	-	0	2	1	5%+
5	0	-	0	6	0	-
6	1	20%+	1	10	0	-
7	0	-	0	5	0	-
8	0	-	1	18	1	20%+
9	1	15%+	0	5	0	-
10	0	-	1	25	0	-
11	1	25%+	0	3	0	-
12	0	-	1	15	0	-
13	0	-	0	2	0	-
14	0	-	0	5	0	-
15	0	-	0	7	0	-
16	0	5%+	0	5	0	-
17	0	-	0	5	0	-
18	0	-	1	10	0	-
19	0	-	1	15	0	-
20	0	-	1	10	0	-
21	1	30%+	0	5	0	-
22	0	2%+	1	20	0	-
23	1	25%+	1	25	0	-
24	0	3%+	1	40	0	-
25	0	5%+	0	5	0	-
26	1	12%+	0	5	0	-
27	0	2%+	0	5	0	-
28	1	+	1	10	0	-
29	1	20%+	1	15	0	-
30	0	5%+	0	6	0	-
31	0	2%+	0	2	0	-
32	1	18%+	1	30	0	-
33	0	4%+	0	1	0	-
34	1	35%+	1	40	0	-
35	0	2%+	1	10	1	2%+
36	0	弱+	0	6	0	-
37	0	2%+	0	5	0	-
38	0	-	0	4	0	-
39	0	10%弱+	0	2	0	-
40	0	-	0	5	0	-
41	0	-	0	2	0	-
42	0	2%+	0	2	0	-
43	1	10%+	0	3	1	2%+
44	1	10%+	0	5	0	-
45	1	35%+	0	6	0	-
46	1	25%+	0	5	0	-
47	1	20%+	0	5	0	-
48	0	-	0	6	0	-
49	0	ruo +	0	5	1	2-5%+
50	0	-	0	2	1	5-10%+
51	0	-	0	5	0	-
52	1	13%+	0	5	0	-
53	1	15%+	0	1	0	-
54	1	13%+	0	1	0	-
55	1	15%+	0	1	0	-
56	0	-	0	1	0	-
Data in FD
	0	0	0
	0	0	0
	0	0	1
	0	0	1
	0	0	0
	1	1	0
	0	0	0
	0	1	1
	1	0	0
	0	1	0
	1	0	0
	0	1	0
	0	0	0
	0	0	0
	0	0	0
	0	0	0
	0	0	0
	0	1	0
	0	1	0
	0	1	0
	1	0	0
	0	1	0
	1	1	0
	0	1	0
	0	0	0
	1	0	0
	0	0	0
	1	1	0
	1	1	0
	0	0	0
	0	0	0
	1	1	0
	0	0	0
	1	1	0
	0	1	1
	0	0	0
	0	0	0
	0	0	0
	0	0	0
	0	0	0
	0	0	0
	0	0	0
	1	0	1
	1	0	0
	1	0	0
	1	0	0
	1	0	0
	0	0	0
	0	0	1
	0	0	1
	0	0	0
	1	0	0
	1	0	0
	1	0	0
	1	0	0
	0	0	0
